# Supplementary material
Source: PubMed Central journal article supplement (PMC5777535)
Supplement: NIHMS928600-supplement-supplement_1.pdf [file NIHMS928600-supplement-supplement_1.pdf]

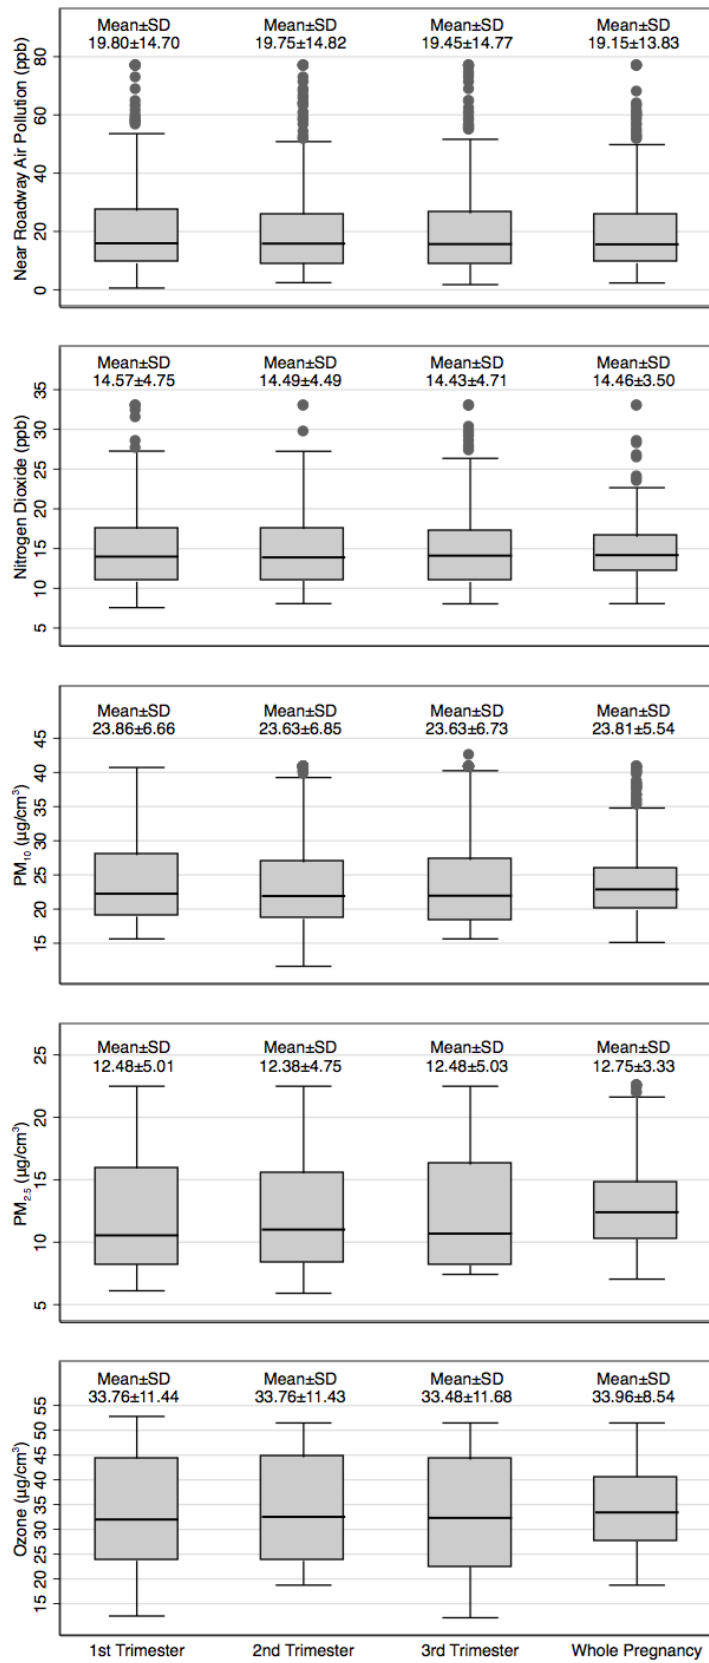

**Supplemental Figure.** Boxplot distribution of air pollutants by pregnancy period (n=606).

**Supplemental Table 1.** Demographic characteristics of CHARGE participants with and without complete exposure data (pollution and/or folic acid intake during month 1) ( $n = 766$ ).

| Demographic Variable                                                        | N (%)                        |                                | Chi-square<br><i>p</i> -value |
|-----------------------------------------------------------------------------|------------------------------|--------------------------------|-------------------------------|
|                                                                             | Complete data<br>( $n=606$ ) | Incomplete data<br>( $n=160$ ) |                               |
| Male sex                                                                    | 510 (84.2)                   | 133 (83.1)                     | 0.751                         |
| Child race/ethnicity                                                        |                              |                                |                               |
| White                                                                       | 315 (52.0)                   | 93 (58.1)                      | 0.378                         |
| Hispanic                                                                    | 116 (19.1)                   | 26 (16.3)                      |                               |
| Other                                                                       | 175 (28.9)                   | 41 (25.6)                      |                               |
| Child's Year of Birth                                                       |                              |                                |                               |
| 1998 – 2001                                                                 | 156 (25.7)                   | 56 (35.0)                      | 0.039                         |
| 2002 – 2003                                                                 | 208 (34.3)                   | 42 (26.3)                      |                               |
| 2004 – 2007                                                                 | 242 (39.9)                   | 62 (38.8)                      |                               |
| Financial Hardship <sup>a</sup> (% yes)                                     | 99 (16.3)                    | 28 (17.7)                      | 0.677                         |
| Home Ownership (% yes)                                                      | 439 (72.7)                   | 112 (70.9)                     | 0.653                         |
| Maximum education in home                                                   |                              |                                |                               |
| Some college or less                                                        | 241 (39.8)                   | 65 (40.6)                      | 0.844                         |
| Bachelor degree                                                             | 365 (60.2)                   | 95 (59.4)                      |                               |
| Mother's Birthplace                                                         |                              |                                |                               |
| Born in USA                                                                 | 479 (79.0)                   | 136 (85.0)                     | 0.092                         |
| Born outside USA                                                            | 127 (21.0)                   | 24 (15.0)                      |                               |
| Maternal age $\geq 35$ years                                                | 133 (22.0)                   | 50 (31.3)                      | 0.014                         |
| Gestational Diabetes (% yes) <sup>b</sup>                                   | 39 (6.5)                     | 8 (5.0)                        | 0.506                         |
| Prepregnancy BMI                                                            |                              |                                |                               |
| <25                                                                         | 349 (57.6)                   | 84 (52.5)                      | 0.512                         |
| 25 to <30                                                                   | 143 (23.6)                   | 42 (26.3)                      |                               |
| 30+                                                                         | 114 (18.8)                   | 34 (21.3)                      |                               |
| Preterm delivery (< 37 weeks) <sup>c</sup>                                  | 51 (8.6)                     | 19 (12.0)                      | 0.190                         |
| Interpregnancy interval <sup>d,e</sup>                                      |                              |                                |                               |
| No prior pregnancy                                                          | 270 (45.2)                   | 83 (52.5)                      | 0.073                         |
| <1 year                                                                     | 60 (10.1)                    | 19 (12.0)                      |                               |
| 1 to <4 years                                                               | 193 (32.3)                   | 34 (21.5)                      |                               |
| 4+ years                                                                    | 74 (12.4)                    | 22 (13.9)                      |                               |
| Parity <sup>f</sup>                                                         |                              |                                |                               |
| 1                                                                           | 270 (44.7)                   | 83 (52.2)                      | 0.148                         |
| 2                                                                           | 223 (36.9)                   | 58 (36.5)                      |                               |
| 3                                                                           | 79 (13.1)                    | 12 (7.6)                       |                               |
| 4+                                                                          | 32 (5.3)                     | 6 (3.8)                        |                               |
| Prenatal vitamin use during 1 <sup>st</sup> month of pregnancy <sup>g</sup> | 339 (55.9)                   | 89 (57.4)                      | 0.741                         |

Abbreviations: CHARGE, Childhood Autism Risk from Genetics and the Environment;

<sup>a</sup> Self report of financial hardship during index period; <sup>b</sup> Missing 2 complete, 1 incomplete;

<sup>c</sup> Missing 10 complete, 1 incomplete; <sup>d</sup> Number of days since previous pregnancy lasting 20

weeks or more; <sup>e</sup> Missing 10 complete, 1 incomplete; <sup>f</sup> Missing 3 complete; <sup>g</sup> Missing 4

incomplete.

**Supplemental Table 2.** Nutrient intake during 1<sup>st</sup> month of pregnancy of CHARGE cases with Autism spectrum disorder (ASD) and controls with typical development ( $n = 606$ ).

| Nutrient                                   | Correlation<br>with 1 <sup>st</sup><br>month FA<br>(Pearson R) <sup>a</sup> | Controls<br>(n=260)<br>(Med (IQR)) | Cases<br>(n=346)<br>(Med (IQR)) | Wilcoxon<br>rank sum<br><i>p</i> -value |
|--------------------------------------------|-----------------------------------------------------------------------------|------------------------------------|---------------------------------|-----------------------------------------|
|                                            | Folic acid                                                                  | -                                  | 812.7<br>(188.9 - 1,026.6)      | 727.7<br>(146.9 - 962.2)                |
| Vitamin C<br>(missing 7 controls, 5 cases) | 0.511                                                                       | 107.5<br>(6.2 - 123.1)             | 100.0<br>(3.0 - 121.9)          | 0.048                                   |
| Zinc                                       | 0.895                                                                       | 19.0<br>(2.8 - 25.0)               | 15.6<br>(2.4 - 25.0)            | 0.145                                   |
| Vitamin D<br>(missing 3 controls, 3 cases) | 0.561                                                                       | 400.0<br>(26.3 - 421.5)            | 354.3<br>(25.1 - 425.8)         | 0.615                                   |
| Vitamin E<br>(missing 1 controls, 1 cases) | 0.459                                                                       | 23.3<br>(0.8 - 30.7)               | 20.5<br>(0.2 - 30.1)            | 0.045                                   |
| Vitamin A                                  | 0.804                                                                       | 3,908.5<br>(559.4 - 4,363.4)       | 2,801.9<br>(349.9 - 4,287.0)    | 0.100                                   |
| Vitamin B6                                 | 0.417                                                                       | 2.8<br>(0.7 - 4.4)                 | 2.6<br>(0.5 - 3.3)              | 0.004                                   |
| Vitamin B12                                | 0.132                                                                       | 8.0<br>(1.7 - 10.6)                | 7.1<br>(1.3 - 9.7)              | 0.077                                   |
| Calcium<br>(missing 3 controls, 3 cases)   | 0.608                                                                       | 216.3<br>(86.3 - 302.6)            | 201.1<br>(53.4 - 314.3)         | 0.272                                   |
| Iron<br>(missing 11 controls, 11 cases)    | 0.812                                                                       | 28.3<br>(7.6 - 37.1)               | 23.7<br>(5.8 - 34.3)            | 0.069                                   |

Abbreviations: ASD, autism spectrum disorder; CHARGE, Childhood Autism Risk from Genetics and the Environment; FA, folic acid; IQR, interquartile range; Med, median.

<sup>a</sup> all Pearson correlation *p*-values <0.001 except Vitamin B12 (*p*=0.001)

**Supplemental Table 3.** Spearman correlations of near roadway air pollution (NRP) and regional pollutants for 606 ASD or typically developing children<sup>a</sup>.

| First Trimester Estimates | Total Pregnancy Estimates |                     |                     |                     |                     |
|---------------------------|---------------------------|---------------------|---------------------|---------------------|---------------------|
|                           | NRP                       | NO <sub>2</sub>     | PM10                | PM2.5               | Ozone               |
| NRP                       | 0.883 <sup>b</sup>        | 0.448 <sup>d</sup>  | 0.132 <sup>d</sup>  | 0.140 <sup>d</sup>  | -0.167 <sup>d</sup> |
| NO <sub>2</sub>           | 0.472 <sup>c</sup>        | 0.613 <sup>b</sup>  | 0.530 <sup>d</sup>  | 0.535 <sup>d</sup>  | -0.155 <sup>d</sup> |
| PM10                      | 0.186 <sup>c</sup>        | 0.583 <sup>c</sup>  | 0.682 <sup>b</sup>  | 0.666 <sup>d</sup>  | 0.203 <sup>d</sup>  |
| PM2.5                     | 0.261 <sup>c</sup>        | 0.716 <sup>c</sup>  | 0.666 <sup>c</sup>  | 0.507 <sup>b</sup>  | 0.000 <sup>d</sup>  |
| Ozone                     | -0.262 <sup>c</sup>       | -0.425 <sup>c</sup> | -0.022 <sup>c</sup> | -0.463 <sup>c</sup> | 0.561 <sup>b</sup>  |

Abbreviations: NRP, near roadway air pollution; NO<sub>2</sub>, nitrogen dioxide; PM2.5, particulate matter < 2.5µm; PM10, particulate matter <10µm.

<sup>a</sup> All correlation measures were statistically significant ( $p \leq .001$ ) except ozone and PM<sub>10</sub> during the first trimester ( $p=0.585$ ) and ozone and PM<sub>2.5</sub> during the whole pregnancy period ( $p=0.992$ ). <sup>b</sup> Correlations of the same pollutant across time periods. <sup>c</sup> Correlations across pollutants within the first trimester.

<sup>d</sup> Correlations across pollutants within pregnancy.

**Supplemental Table 4.** Unadjusted main effects of air pollutants on Autism spectrum disorder (ASD) risk in CHARGE cases with ASD and controls with typical development ( $n = 606$ ).

| Pollutant         | Variable type <sup>a, b</sup>     | Trimester 1<br>OR (95% CI) | Trimester 2<br>OR (95% CI) | Trimester 3<br>OR (95% CI) | Whole Pregnancy<br>OR (95% CI) |
|-------------------|-----------------------------------|----------------------------|----------------------------|----------------------------|--------------------------------|
| NRP               | Continuous (2 SD scale)           | 1.27 (0.91, 1.76)          | 1.23 (0.88, 1.70)          | 1.47 (1.05, 2.06)          | 1.31 (0.94, 1.82)              |
|                   | Binary: $\geq$ Med (ref: $<$ Med) | 1.16 (0.84, 1.60)          | 1.42 (1.03, 1.96)          | 1.36 (0.99, 1.88)          | 1.43 (1.03, 1.97)              |
| NO <sub>2</sub>   | Continuous (2 SD scale)           | 1.36 (0.98, 1.89)          | 1.27 (0.91, 1.75)          | 1.33 (0.96, 1.85)          | 1.46 (1.05, 2.04)              |
|                   | Binary: $\geq$ Med (ref: $<$ Med) | 1.24 (0.90, 1.71)          | 1.14 (0.83, 1.58)          | 1.09 (0.79, 1.51)          | 1.58 (1.15, 2.19)              |
| PM <sub>10</sub>  | Continuous (2 SD scale)           | 1.31 (0.94, 1.81)          | 1.44 (1.03, 2.00)          | 1.37 (0.98, 1.90)          | 1.54 (1.10, 2.15)              |
|                   | Binary: $\geq$ Med (ref: $<$ Med) | 1.23 (0.89, 1.70)          | 1.24 (0.90, 1.72)          | 1.35 (0.97, 1.87)          | 1.04 (0.76, 1.44)              |
| PM <sub>2.5</sub> | Continuous (2 SD scale)           | 1.24 (0.89, 1.71)          | 1.19 (0.86, 1.64)          | 1.30 (0.93, 1.79)          | 1.62 (1.16, 2.25)              |
|                   | Binary: $\geq$ Med (ref: $<$ Med) | 1.25 (0.90, 1.74)          | 1.03 (0.74, 1.43)          | 1.20 (0.86, 1.67)          | 1.37 (0.99, 1.89)              |
| Ozone             | Continuous (2 SD scale)           | 1.24 (0.90, 1.71)          | 1.29 (0.93, 1.78)          | 1.27 (0.92, 1.75)          | 1.40 (1.01, 1.93)              |
|                   | Binary: $\geq$ Med (ref: $<$ Med) | 1.02 (0.74, 1.40)          | 1.06 (0.77, 1.47)          | 1.13 (0.82, 1.56)          | 1.21 (0.88, 1.67)              |

Abbreviations: ASD, autism spectrum disorder; FA, folic acid; NRP, near roadway air pollution; NO<sub>2</sub>, nitrogen dioxide; PM<sub>2.5</sub>, particulate matter  $< 2.5 \mu\text{m}$ ; PM<sub>10</sub>, particulate matter  $< 10 \mu\text{m}$ .

<sup>a</sup> Continuous air pollution effects reflect risk of autism based on 2 SDs from the mean value, for each pollutant at each time period, as reflected in Supplemental Figure. <sup>b</sup> Binary air pollutants were dichotomized at their whole pregnancy period median (high vs low) (NRP = 15.58 ppb; NO<sub>2</sub> = 14.18 ppb; PM<sub>10</sub> = 22.88  $\mu\text{g}/\text{cm}^3$ ; PM<sub>2.5</sub> = 12.40  $\mu\text{g}/\text{cm}^3$ ; Ozone = 33.41  $\mu\text{g}/\text{cm}^3$ ).

**Supplemental Table 5.** Risk of ASD for 606 Children based on Continuous Pollutant Exposure by Periconceptional Folic Acid Intake<sup>a</sup>

| Air pollutant           | Month 1 FA      | Adjusted Odds Ratio (95% CI) <sup>b,c</sup> |                           |                   |
|-------------------------|-----------------|---------------------------------------------|---------------------------|-------------------|
|                         | (< or ≥ 800 µg) | 2 <sup>nd</sup> Trimester                   | 3 <sup>rd</sup> Trimester | Whole Pregnancy   |
| <b>NRP</b>              | Low             | 1.32 (0.77, 2.26)                           | 1.45 (0.86, 2.46)         | 1.45 (0.85, 2.47) |
|                         | High            | 1.00 (0.65, 1.56)                           | 1.33 (0.84, 2.12)         | 1.05 (0.67, 1.65) |
|                         | Interaction p   | 0.436                                       | 0.810                     | 0.366             |
| <b>NO<sub>2</sub></b>   | Low             | 1.25 (0.73, 2.14)                           | 1.04 (0.64, 1.71)         | 1.40 (0.81, 2.42) |
|                         | High            | 0.88 (0.57, 1.38)                           | 1.19 (0.74, 1.92)         | 0.89 (0.56, 1.42) |
|                         | Interaction p   | 0.326                                       | 0.698                     | 0.210             |
| <b>PM<sub>10</sub></b>  | Low             | 1.47 (0.88, 2.45)                           | 1.18 (0.72, 1.94)         | 1.38 (0.82, 2.32) |
|                         | High            | 1.22 (0.77, 1.93)                           | 1.28 (0.79, 2.06)         | 1.23 (0.77, 1.98) |
|                         | Interaction p   | 0.591                                       | 0.821                     | 0.748             |
| <b>PM<sub>2.5</sub></b> | Low             | 0.99 (0.60, 1.63)                           | 0.98 (0.61, 1.59)         | 1.09 (0.64, 1.84) |
|                         | High            | 1.07 (0.68, 1.70)                           | 1.33 (0.82, 2.16)         | 1.33 (0.83, 2.13) |
|                         | Interaction p   | 0.808                                       | 0.381                     | 0.572             |
| <b>Ozone</b>            | Low             | 1.18 (0.73, 1.91)                           | 1.25 (0.76, 2.05)         | 1.23 (0.75, 2.01) |
|                         | High            | 1.00 (0.62, 1.62)                           | 0.93 (0.58, 1.47)         | 0.99 (0.61, 1.59) |
|                         | Interaction p   | 0.628                                       | 0.385                     | 0.522             |

Abbreviations: ASD, autism spectrum disorder; FA, folic acid; NRP, near roadway air pollution; NO<sub>2</sub>, nitrogen dioxide; PM<sub>2.5</sub>, particulate matter < 2.5 µm; PM<sub>10</sub>, particulate matter < 10 µm.

<sup>a</sup> Folic acid intake is dichotomized at 800 µg (high vs. low) and includes all folic acid intake during the first month of pregnancy. <sup>b</sup> Air pollution effects reflect risk of autism based on 2 SDs from the mean value, for each pollutant at each time period, as reflected in Supplemental Figure. <sup>c</sup> Model was adjusted for self-reported financial hardship between 3 months before pregnancy to time of interview (yes/no), child's year of birth, vitamin A and zinc intake during the first month of pregnancy.

**Supplemental Table 6.** Joint associations between ASD, folic acid (FA) intake<sup>a</sup> and air pollution (near roadway air pollution (NRP) and regional pollutants)<sup>b</sup> during the whole pregnancy period. N=606

| Poll.             | FA<br>< or ≥<br>median | FA<br>< or ≥<br>800 µg | N<br>ASD/<br>Control | Unadjusted Model  |                   | Adjusted Model <sup>c</sup> |                 |               |                            |                        |
|-------------------|------------------------|------------------------|----------------------|-------------------|-------------------|-----------------------------|-----------------|---------------|----------------------------|------------------------|
|                   |                        |                        |                      | OR (95% CI)       | OR (95% CI)       | Additive interaction        |                 |               | Multiplicative Interaction |                        |
|                   |                        |                        |                      |                   |                   | Expected<br>Joint OR        | RERI<br>p-value | AP<br>p-value | Expected<br>Joint OR       | Interaction<br>p-value |
| NRP               | Low                    | High                   | 76/79                | 1.0 (ref)         | 1.0 (ref)         |                             |                 |               |                            |                        |
|                   |                        | Low                    | 85/65                | 1.36 (0.87, 2.13) | 1.17 (0.59, 2.32) |                             |                 |               |                            |                        |
|                   | High                   | High                   | 90/72                | 1.30 (0.84, 2.02) | 1.21 (0.76, 1.91) |                             |                 |               |                            |                        |
|                   |                        | Low                    | 95/44                | 2.24 (1.39, 3.61) | 1.63 (0.80, 3.34) | 1.38                        | 0.564           | 0.539         | 1.42                       | 0.673                  |
| NO <sub>2</sub>   | Low                    | High                   | 78/84                | 1.0 (ref)         | 1.0 (ref)         |                             |                 |               |                            |                        |
|                   |                        | Low                    | 78/63                | 1.33 (0.85, 2.10) | 1.07 (0.54, 2.13) |                             |                 |               |                            |                        |
|                   | High                   | High                   | 88/67                | 1.41 (0.91, 2.20) | 1.11 (0.70, 1.77) |                             |                 |               |                            |                        |
|                   |                        | Low                    | 102/46               | 2.39 (1.50, 3.80) | 1.48 (0.74, 2.94) | 1.18                        | 0.463           | 0.435         | 1.19                       | 0.532                  |
| PM <sub>10</sub>  | Low                    | High                   | 91/78                | 1.0 (ref)         | 1.0 (ref)         |                             |                 |               |                            |                        |
|                   |                        | Low                    | 81/54                | 1.29 (0.81, 2.03) | 1.01 (0.51, 1.98) |                             |                 |               |                            |                        |
|                   | High                   | High                   | 75/73                | 0.88 (0.57, 1.37) | 0.82 (0.51, 1.30) |                             |                 |               |                            |                        |
|                   |                        | Low                    | 99/55                | 1.54 (0.99, 2.41) | 1.15 (0.60, 2.21) | 0.83                        | 0.312           | 0.305         | 0.83                       | 0.328                  |
| PM <sub>2.5</sub> | Low                    | High                   | 85/92                | 1.0 (ref)         | 1.0 (ref)         |                             |                 |               |                            |                        |
|                   |                        | Low                    | 77/50                | 1.67 (1.05, 2.65) | 1.38 (0.70, 2.73) |                             |                 |               |                            |                        |
|                   | High                   | High                   | 81/59                | 1.49 (0.95, 2.32) | 1.23 (0.77, 1.97) |                             |                 |               |                            |                        |
|                   |                        | Low                    | 103/59               | 1.89 (1.22, 2.92) | 1.27 (0.65, 2.48) | 1.61                        | 0.448           | 0.458         | 1.70                       | 0.394                  |
| Ozone             | Low                    | High                   | 86/78                | 1.0 (ref)         | 1.0 (ref)         |                             |                 |               |                            |                        |
|                   |                        | Low                    | 80/59                | 1.23 (0.78, 1.94) | 0.94 (0.48, 1.83) |                             |                 |               |                            |                        |
|                   | High                   | High                   | 80/73                | 0.99 (0.64, 1.55) | 0.76 (0.48, 1.22) |                             |                 |               |                            |                        |
|                   |                        | Low                    | 100/50               | 1.81 (1.15, 2.87) | 1.17 (0.60, 2.27) | 0.70                        | 0.135           | 0.118         | 0.71                       | 0.153                  |

Abbreviations: ASD, autism spectrum disorder; FA, folic acid; NRP, near roadway air pollution; NO<sub>2</sub>, nitrogen dioxide; PM<sub>2.5</sub>, particulate matter < 2.5 µm; PM<sub>10</sub>, particulate matter < 10 µm; Preg, pregnancy.

<sup>a</sup> Folic acid intake is dichotomized at 800 µg (high vs. low) and includes all folic acid intake during the first month of pregnancy. <sup>b</sup> All pollutants were dichotomized at their whole pregnancy period median (high vs low) (NRP = 15.58 ppb; NO<sub>2</sub> = 14.18 ppb; PM<sub>10</sub> = 22.88 µg/cm<sup>3</sup>; PM<sub>2.5</sub> = 12.40 µg/cm<sup>3</sup>; Ozone = 33.41 µg/cm<sup>3</sup>). <sup>c</sup> Model was adjusted for self-reported financial hardship between 3 months before pregnancy to time of interview (yes/no), child's year of birth, vitamin A and zinc intake during the first month of pregnancy.

**Supplemental Table 7.** Joint associations between ASD, folic acid (FA) intake<sup>a</sup> and air pollution (near roadway air pollution (NRP) and regional pollutants)<sup>b</sup> during the second trimester of pregnancy. N=606

| Poll.             | FA<br>< or ≥<br>median | FA<br>< or ≥<br>800 µg | N<br>ASD/<br>Control | Unadjusted Model  |                   | Adjusted Model <sup>c</sup> |                 |               |                            |                        |
|-------------------|------------------------|------------------------|----------------------|-------------------|-------------------|-----------------------------|-----------------|---------------|----------------------------|------------------------|
|                   |                        |                        |                      | OR (95% CI)       | OR (95% CI)       | Additive interaction        |                 |               | Multiplicative Interaction |                        |
|                   |                        |                        |                      |                   |                   | Expected<br>Joint OR        | RERI<br>p-value | AP<br>p-value | Expected<br>Joint OR       | Interaction<br>p-value |
| NRP               | Low                    | High                   | 78/77                | 1.0 (ref)         | 1.0 (ref)         |                             |                 |               |                            |                        |
|                   |                        | Low                    | 78/63                | 1.22 (0.77, 1.93) | 1.06 (0.53, 2.12) |                             |                 |               |                            |                        |
|                   | High                   | High                   | 88/74                | 1.17 (0.76, 1.83) | 1.15 (0.72, 1.81) |                             |                 |               |                            |                        |
|                   |                        | Low                    | 102/46               | 2.19 (1.37, 3.50) | 1.61 (0.80, 3.25) | 1.21                        | 0.334           | 0.286         | 1.22                       | 0.410                  |
| NO <sub>2</sub>   | Low                    | High                   | 86/74                | 1.0 (ref)         | 1.0 (ref)         |                             |                 |               |                            |                        |
|                   |                        | Low                    | 86/64                | 1.16 (0.74, 1.81) | 0.91 (0.46, 1.78) |                             |                 |               |                            |                        |
|                   | High                   | High                   | 80/77                | 0.89 (0.58, 1.39) | 0.79 (0.50, 1.25) |                             |                 |               |                            |                        |
|                   |                        | Low                    | 94/45                | 1.80 (1.12, 2.88) | 1.21 (0.61, 2.40) | 0.70                        | 0.108           | 0.087         | 0.72                       | 0.128                  |
| PM <sub>10</sub>  | Low                    | High                   | 97/93                | 1.0 (ref)         | 1.0 (ref)         |                             |                 |               |                            |                        |
|                   |                        | Low                    | 91/62                | 1.41 (0.92, 2.16) | 1.10 (0.57, 2.15) |                             |                 |               |                            |                        |
|                   | High                   | High                   | 69/58                | 1.14 (0.73, 1.79) | 1.08 (0.68, 1.72) |                             |                 |               |                            |                        |
|                   |                        | Low                    | 89/47                | 1.82 (1.15, 2.86) | 1.35 (0.70, 2.61) | 1.18                        | 0.662           | 0.653         | 1.19                       | 0.711                  |
| PM <sub>2.5</sub> | Low                    | High                   | 109/92               | 1.0 (ref)         | 1.0 (ref)         |                             |                 |               |                            |                        |
|                   |                        | Low                    | 100/67               | 1.26 (0.83, 1.91) | 0.97 (0.51, 1.85) |                             |                 |               |                            |                        |
|                   | High                   | High                   | 57/59                | 0.82 (0.52, 1.29) | 0.73 (0.46, 1.18) |                             |                 |               |                            |                        |
|                   |                        | Low                    | 80/42                | 1.61 (1.01, 2.56) | 1.15 (0.58, 2.28) | 0.70                        | 0.162           | 0.138         | 0.71                       | 0.170                  |
| Ozone             | Low                    | High                   | 92/82                | 1.0 (ref)         | 1.0 (ref)         |                             |                 |               |                            |                        |
|                   |                        | Low                    | 89/58                | 1.37 (0.88, 2.13) | 1.05 (0.55, 2.00) |                             |                 |               |                            |                        |
|                   | High                   | High                   | 74/69                | 0.96 (0.61, 1.49) | 0.78 (0.49, 1.25) |                             |                 |               |                            |                        |
|                   |                        | Low                    | 91/51                | 1.59 (1.01, 2.50) | 1.13 (0.58, 2.19) | 0.83                        | 0.355           | 0.340         | 0.82                       | 0.347                  |

Abbreviations: AP, attributable proportion due to interaction; ASD, autism spectrum disorder; FA, folic acid; NO<sub>2</sub>, nitrogen dioxide; NRP, near roadway pollution; PM<sub>2.5</sub>, particulate matter < 2.5 µm; PM<sub>10</sub>, particulate matter < 10 µm; RERI, relative excess risk due to interaction.

<sup>a</sup> Folic acid intake is dichotomized at 800 µg (high vs. low) and includes all folic acid intake during the first month of pregnancy. <sup>b</sup> All pollutants were dichotomized at their whole pregnancy period median (high vs low) (NRP = 15.58 ppb; NO<sub>2</sub> = 14.18 ppb; PM<sub>10</sub> = 22.88 µg/cm<sup>3</sup>; PM<sub>2.5</sub> = 12.40 µg/cm<sup>3</sup>; Ozone = 33.41 µg/cm<sup>3</sup>). <sup>c</sup> Model was adjusted for self-reported financial hardship between 3 months before pregnancy to time of interview (yes/no), child's year of birth, vitamin A and zinc intake during the first month of pregnancy.



**Supplemental Table 8.** Joint associations between ASD, folic acid (FA) intake<sup>a</sup> and air pollution (near roadway air pollution (NRP) and regional pollutants)<sup>b</sup> during the third trimester of pregnancy. N=606

| Poll.<br>< or ≥<br>median | FA<br>< or ≥<br>800 µg | N<br>ASD/<br>Control | Unadjusted Model |                   | Adjusted Model <sup>c</sup> |                 |               |                            |                        |       |
|---------------------------|------------------------|----------------------|------------------|-------------------|-----------------------------|-----------------|---------------|----------------------------|------------------------|-------|
|                           |                        |                      | OR (95% CI)      | OR (95% CI)       | Additive interaction        |                 |               | Multiplicative Interaction |                        |       |
|                           |                        |                      |                  |                   | Expected<br>Joint OR        | RERI<br>p-value | AP<br>p-value | Expected<br>Joint OR       | Interaction<br>p-value |       |
| NRP                       | Low                    | High                 | 75/81            | 1.0 (ref)         | 1.0 (ref)                   |                 |               |                            |                        |       |
|                           |                        | Low                  | 86/60            | 1.55 (0.98, 2.44) | 1.38 (0.70, 2.74)           |                 |               |                            |                        |       |
|                           | High                   | High                 | 91/70            | 1.40 (0.90, 2.19) | 1.39 (0.88, 2.20)           |                 |               |                            |                        |       |
|                           |                        | Low                  | 94/49            | 2.07 (1.30, 3.30) | 1.53 (0.77, 3.07)           | 1.77            | 0.618         | 0.630                      | 1.92                   | 0.512 |
| NO <sub>2</sub>           | Low                    | High                 | 77/85            | 1.0 (ref)         | 1.0 (ref)                   |                 |               |                            |                        |       |
|                           |                        | Low                  | 95/50            | 2.10 (1.32, 3.33) | 1.74 (0.87, 3.47)           |                 |               |                            |                        |       |
|                           | High                   | High                 | 89/66            | 1.49 (0.96, 2.32) | 1.33 (0.84, 2.11)           |                 |               |                            |                        |       |
|                           |                        | Low                  | 85/59            | 1.59 (1.01, 2.50) | 1.17 (0.60, 2.30)           | 2.07            | 0.111         | 0.105                      | 2.31                   | 0.047 |
| PM <sub>10</sub>          | Low                    | High                 | 92/92            | 1.0 (ref)         | 1.0 (ref)                   |                 |               |                            |                        |       |
|                           |                        | Low                  | 93/66            | 1.41 (0.92, 2.16) | 1.12 (0.59, 2.14)           |                 |               |                            |                        |       |
|                           | High                   | High                 | 74/59            | 1.25 (0.80, 1.96) | 1.21 (0.76, 1.93)           |                 |               |                            |                        |       |
|                           |                        | Low                  | 87/43            | 2.02 (1.27, 3.22) | 1.53 (0.78, 2.98)           | 1.33            | 0.666         | 0.650                      | 1.36                   | 0.744 |
| PM <sub>2.5</sub>         | Low                    | High                 | 102/100          | 1.0 (ref)         | 1.0 (ref)                   |                 |               |                            |                        |       |
|                           |                        | Low                  | 101/64           | 1.55 (1.02, 2.35) | 1.24 (0.64, 2.39)           |                 |               |                            |                        |       |
|                           | High                   | High                 | 64/51            | 1.23 (0.78, 1.95) | 1.13 (0.70, 1.82)           |                 |               |                            |                        |       |
|                           |                        | Low                  | 79/45            | 1.72 (1.09, 2.72) | 1.27 (0.65, 2.46)           | 1.37            | 0.820         | 0.822                      | 1.40                   | 0.789 |
| Ozone                     | Low                    | High                 | 89/85            | 1.0 (ref)         | 1.0 (ref)                   |                 |               |                            |                        |       |
|                           |                        | Low                  | 88/56            | 1.50 (0.96, 2.35) | 1.10 (0.58, 2.10)           |                 |               |                            |                        |       |
|                           | High                   | High                 | 77/66            | 1.11 (0.72, 1.74) | 0.88 (0.55, 1.41)           |                 |               |                            |                        |       |
|                           |                        | Low                  | 92/53            | 1.66 (1.06, 2.60) | 1.17 (0.60, 2.28)           | 0.98            | 0.594         | 0.585                      | 0.97                   | 0.589 |

Abbreviations: AP, attributable proportion due to interaction; ASD, autism spectrum disorder; FA, folic acid; NO<sub>2</sub>, nitrogen dioxide; NRP, near roadway pollution; PM<sub>2.5</sub>, particulate matter < 2.5 µm; PM<sub>10</sub>, particulate matter < 10 µm; RERI, relative excess risk due to interaction. <sup>a</sup> Folic acid intake is dichotomized at 800 µg (high vs. low) and includes all folic acid intake during the first month of pregnancy. <sup>b</sup> All pollutants were dichotomized at their whole pregnancy period median (high vs low) (NRP = 15.58 ppb; NO<sub>2</sub> = 14.18 ppb; PM<sub>10</sub> = 22.88 µg/cm<sup>3</sup>; PM<sub>2.5</sub> = 12.40 µg/cm<sup>3</sup>; Ozone = 33.41 µg/cm<sup>3</sup>). <sup>c</sup> Model was adjusted for self-reported financial hardship between 3 months before pregnancy to time of interview (yes/no), child's year of birth, vitamin A and zinc intake during the first month of pregnancy.

**Supplemental Table 9.** Joint associations between ASD, folic acid (FA) intake<sup>a</sup> and air pollution (near roadway air pollution (NRP) and regional pollutants dichotomized at the 75<sup>th</sup> percentile)<sup>b</sup> during the first trimester of pregnancy. N=606

| Poll.<br>< or ≥ 75 <sup>th</sup><br>percentile | FA<br>< or ≥<br>800 µg | N<br>ASD/<br>Control | Unadjusted Model |                   | Adjusted Model <sup>c</sup> |                 |               |                            |                        |       |
|------------------------------------------------|------------------------|----------------------|------------------|-------------------|-----------------------------|-----------------|---------------|----------------------------|------------------------|-------|
|                                                |                        |                      | OR (95% CI)      | OR (95% CI)       | Additive interaction        |                 |               | Multiplicative Interaction |                        |       |
|                                                |                        |                      |                  |                   | Expected<br>Joint OR        | RERI<br>p-value | AP<br>p-value | Expected<br>Joint OR       | Interaction<br>p-value |       |
| NRP                                            | Low                    | High                 | 125/106          | 1.0 (ref)         | 1.0 (ref)                   |                 |               |                            |                        |       |
|                                                |                        | Low                  | 122/88           | 1.18 (0.81, 1.71) | 0.97 (0.53, 1.78)           |                 |               |                            |                        |       |
|                                                | High                   | High                 | 41/45            | 0.77 (0.47, 1.27) | 0.72 (0.43, 1.21)           |                 |               |                            |                        |       |
|                                                |                        | Low                  | 58/21            | 2.34 (1.34, 4.11) | 1.70 (0.79, 3.66)           | 0.69            | 0.058         | 0.002                      | 0.70                   | 0.026 |
| NO <sub>2</sub>                                | Low                    | High                 | 116/108          | 1.0 (ref)         | 1.0 (ref)                   |                 |               |                            |                        |       |
|                                                |                        | Low                  | 118/83           | 1.32 (0.90, 1.94) | 1.01 (0.54, 1.89)           |                 |               |                            |                        |       |
|                                                | High                   | High                 | 50/43            | 1.08 (0.67, 1.76) | 0.85 (0.51, 1.42)           |                 |               |                            |                        |       |
|                                                |                        | Low                  | 62/26            | 2.22 (1.31, 3.76) | 1.48 (0.71, 3.07)           | 0.86            | 0.163         | 0.077                      | 0.86                   | 0.156 |
| PM <sub>10</sub>                               | Low                    | High                 | 118/106          | 1.0 (ref)         | 1.0 (ref)                   |                 |               |                            |                        |       |
|                                                |                        | Low                  | 114/77           | 1.33 (0.90, 1.97) | 1.05 (0.56, 1.95)           |                 |               |                            |                        |       |
|                                                | High                   | High                 | 48/45            | 0.96 (0.59, 1.56) | 0.85 (0.51, 1.40)           |                 |               |                            |                        |       |
|                                                |                        | Low                  | 66/32            | 1.85 (1.13, 3.05) | 1.33 (0.66, 2.68)           | 0.90            | 0.264         | 0.199                      | 0.89                   | 0.270 |
| PM <sub>2.5</sub>                              | Low                    | High                 | 117/112          | 1.0 (ref)         | 1.0 (ref)                   |                 |               |                            |                        |       |
|                                                |                        | Low                  | 117/78           | 1.44 (0.98, 2.11) | 1.16 (0.62, 2.15)           |                 |               |                            |                        |       |
|                                                | High                   | High                 | 49/39            | 1.20 (0.73, 1.97) | 1.08 (0.65, 1.80)           |                 |               |                            |                        |       |
|                                                |                        | Low                  | 63/31            | 1.95 (1.18, 3.21) | 1.41 (0.69, 2.89)           | 1.24            | 0.709         | 0.695                      | 1.25                   | 0.754 |
| Ozone                                          | Low                    | High                 | 111/112          | 1.0 (ref)         | 1.0 (ref)                   |                 |               |                            |                        |       |
|                                                |                        | Low                  | 115/76           | 1.53 (1.03, 2.26) | 1.18 (0.63, 2.21)           |                 |               |                            |                        |       |
|                                                | High                   | High                 | 55/39            | 1.42 (0.87, 2.32) | 1.26 (0.76, 2.09)           |                 |               |                            |                        |       |
|                                                |                        | Low                  | 65/33            | 1.99 (1.21, 3.26) | 1.42 (0.72, 2.80)           | 1.44            | 0.982         | 0.982                      | 1.49                   | 0.917 |

Abbreviations: AP, attributable proportion due to interaction; ASD, autism spectrum disorder; FA, folic acid; NO<sub>2</sub>, nitrogen dioxide; NRP, near roadway pollution; PM<sub>2.5</sub>, particulate matter < 2.5 µm; PM<sub>10</sub>, particulate matter < 10 µm; RERI, relative excess risk due to interaction.

<sup>a</sup> Folic acid intake is dichotomized at 800 µg (high vs. low) and includes all folic acid intake during the first month of pregnancy. <sup>b</sup> All pollutants were dichotomized at their whole pregnancy period 75<sup>th</sup> percentile (high vs low) (NRP = 25.87 ppb; NO<sub>2</sub> = 16.47 ppb; PM<sub>10</sub> = 25.90 µg/cm<sup>3</sup>; PM<sub>2.5</sub> = 14.80 µg/cm<sup>3</sup>; Ozone = 40.59 µg/cm<sup>3</sup>). <sup>c</sup> Model was adjusted for self-reported financial hardship between 3 months before pregnancy to time of interview (yes/no), child's year of birth, vitamin A and zinc intake during the first month of pregnancy.

**Supplemental Table 10.** Joint associations between ASD, folic acid (FA) intake<sup>a</sup> and air pollution (near roadway air pollution (NRP) and regional pollutants dichotomized at the 75<sup>th</sup> percentile)<sup>b</sup> during the whole pregnancy period. N=606

| Poll.<br>< or ≥ 75 <sup>th</sup><br>percentile | FA<br>< or ≥<br>800 μg | N<br>ASD/<br>Control | Unadjusted Model |                   | Adjusted Model <sup>c</sup> |                 |               |                            |                        |       |
|------------------------------------------------|------------------------|----------------------|------------------|-------------------|-----------------------------|-----------------|---------------|----------------------------|------------------------|-------|
|                                                |                        |                      | OR (95% CI)      | OR (95% CI)       | Additive interaction        |                 |               | Multiplicative Interaction |                        |       |
|                                                |                        |                      |                  |                   | Expected<br>Joint OR        | RERI<br>p-value | AP<br>p-value | Expected<br>Joint OR       | Interaction<br>p-value |       |
| NRP                                            | Low                    | High                 | 123/111          | 1.0 (ref)         | 1.0 (ref)                   |                 |               |                            |                        |       |
|                                                |                        | Low                  | 132/88           | 1.35 (0.93, 1.96) | 1.10 (0.60, 2.03)           |                 |               |                            |                        |       |
|                                                | High                   | High                 | 43/40            | 0.97 (0.59, 1.60) | 0.93 (0.56, 1.56)           |                 |               |                            |                        |       |
|                                                |                        | Low                  | 48/21            | 2.06 (1.16, 3.66) | 1.47 (0.68, 3.18)           | 1.03            | 0.378         | 0.287                      | 1.02                   | 0.376 |
| NO <sub>2</sub>                                | Low                    | High                 | 120/118          | 1.0 (ref)         | 1.0 (ref)                   |                 |               |                            |                        |       |
|                                                |                        | Low                  | 130/87           | 1.47 (1.01, 2.13) | 1.13 (0.61, 2.09)           |                 |               |                            |                        |       |
|                                                | High                   | High                 | 46/33            | 1.37 (0.82, 2.29) | 0.97 (0.56, 1.68)           |                 |               |                            |                        |       |
|                                                |                        | Low                  | 50/22            | 2.23 (1.27, 3.92) | 1.38 (0.64, 2.97)           | 1.10            | 0.547         | 0.505                      | 1.10                   | 0.565 |
| PM <sub>10</sub>                               | Low                    | High                 | 123/123          | 1.0 (ref)         | 1.0 (ref)                   |                 |               |                            |                        |       |
|                                                |                        | Low                  | 122/88           | 1.39 (0.96, 2.01) | 1.04 (0.56, 1.94)           |                 |               |                            |                        |       |
|                                                | High                   | High                 | 43/28            | 1.54 (0.90, 2.63) | 1.37 (0.79, 2.39)           |                 |               |                            |                        |       |
|                                                |                        | Low                  | 58/21            | 2.76 (1.58, 4.83) | 1.99 (0.96, 4.11)           | 1.41            | 0.392         | 0.293                      | 1.42                   | 0.422 |
| PM <sub>2.5</sub>                              | Low                    | High                 | 124/126          | 1.0 (ref)         | 1.0 (ref)                   |                 |               |                            |                        |       |
|                                                |                        | Low                  | 124/80           | 1.57 (1.08, 2.29) | 1.31 (0.71, 2.43)           |                 |               |                            |                        |       |
|                                                | High                   | High                 | 42/25            | 1.71 (0.98, 2.97) | 1.38 (0.78, 2.46)           |                 |               |                            |                        |       |
|                                                |                        | Low                  | 56/29            | 1.96 (1.18, 3.28) | 1.26 (0.62, 2.56)           | 1.69            | 0.419         | 0.459                      | 1.81                   | 0.365 |
| Ozone                                          | Low                    | High                 | 127/120          | 1.0 (ref)         | 1.0 (ref)                   |                 |               |                            |                        |       |
|                                                |                        | Low                  | 125/82           | 1.44 (0.99, 2.09) | 1.12 (0.61, 2.07)           |                 |               |                            |                        |       |
|                                                | High                   | High                 | 39/31            | 1.19 (0.70, 2.03) | 0.94 (0.54, 1.63)           |                 |               |                            |                        |       |
|                                                |                        | Low                  | 55/27            | 1.92 (1.14, 3.25) | 1.31 (0.64, 2.68)           | 1.06            | 0.562         | 0.530                      | 1.05                   | 0.576 |

Abbreviations: AP, attributable proportion due to interaction; ASD, autism spectrum disorder; FA, folic acid; NO<sub>2</sub>, nitrogen dioxide; NRP, near roadway pollution; PM<sub>2.5</sub>, particulate matter < 2.5 μm; PM<sub>10</sub>, particulate matter < 10 μm; RERI, relative excess risk due to interaction.

<sup>a</sup> Folic acid intake is dichotomized at 800 μg (high vs. low) and includes all folic acid intake during the first month of pregnancy. <sup>b</sup> All pollutants were dichotomized at their whole pregnancy period 75<sup>th</sup> percentile (high vs low) (NRP = 25.87 ppb; NO<sub>2</sub> = 16.47 ppb; PM<sub>10</sub> = 25.90 μg/cm<sup>3</sup>; PM<sub>2.5</sub> = 14.80 μg/cm<sup>3</sup>; Ozone = 40.59 μg/cm<sup>3</sup>). <sup>c</sup> Model was adjusted for self-reported financial hardship between 3 months before pregnancy to time of interview (yes/no), child's year of birth, vitamin A and zinc intake during the first month of pregnancy.
